# Supplementary material for: Phylogenetic and variability study on all known hemagglutinin subtypes of influenza A virus
Source: publisher site journal article supplement (doi:10.1515/bams-2017-0009), 2017-06-13
Supplement: Supplementary file 1 [file Consensus_FASTA.docx]

>Consensus

MEKIIILLLLLAXTAVKADKICIGYHANNSTTKVDTLTENNVEVTHAVELVETTHNGKLCSLNGKSPLDL

GDCSIEGWILGNPQCDLLLGGREWSYIVERPNAPNGICYPGDVENYEELRSLFSSSXSFGRIEIIPKFTW

GNGVTTNGVSSACKRXGGXSSFYRNLVWLTKKKNGAYPVINGTYNNTGGEDVLILWGIHHPSTTTEQTKL

YKNANTYVSVGTSTYNRSFVPEIGTRPKVNGQSGRIDFYWTLLKPGDTITFESNGNLIAPRYGYKLSKXG

HGRIIQSDLPIGNCETKCQTPGGAINTNKPFQNISRNTIGECPKYVKSGSLKLATGLRNVPEKQSRGLFG

AIAGFIEGGWPGLIDGWYGFRHQNAQGTGYAADKKSTQKAIDQITNKVNNIIEKMNTQFESIEKEFSEVE

KRINNLNKKVDDGITDIWSYNAELLVLLENQHTLDLHDSNVNNLYEKVRRQLRENAEDDGNGCFEIYHKC

DNECMESIRNGTYDHPKYREESKLNRQEINGVKLESMGVYKILSIYSTVASSLVLVALILGFIFWACSNG

NCRCTICI
